# Supplementary material for: The Epidemiology of Antibiotic-Related Adverse Events in the Treatment of Diabetic Foot Infections: A Narrative Review of the Literature
Source: MDPI journal article supplement (doi:10.3390/antibiotics12040774), 2023-04-18
Supplement: s1 [file s1]

**Supplementary Table S1.** Drug–drug interactions.

| Antibiotic                                                | Drug interaction                                                                                                                                                                                                                                                                                            | Adverse event                                                                                                                                                                                                                                                                                                                                                     | Management recommendations                                                                                                                                                                                                                                                                                                                                            |
|-----------------------------------------------------------|-------------------------------------------------------------------------------------------------------------------------------------------------------------------------------------------------------------------------------------------------------------------------------------------------------------|-------------------------------------------------------------------------------------------------------------------------------------------------------------------------------------------------------------------------------------------------------------------------------------------------------------------------------------------------------------------|-----------------------------------------------------------------------------------------------------------------------------------------------------------------------------------------------------------------------------------------------------------------------------------------------------------------------------------------------------------------------|
| <b>Beta-lactams</b>                                       | <ul style="list-style-type: none"> <li>• Methotrexate</li> <li>• Allopurinol</li> <li>• Phenprocoumon</li> </ul>                                                                                                                                                                                            | <ul style="list-style-type: none"> <li>• Increased serum concentration of methotrexate</li> <li>• Enhance the potential for allergic or hypersensitivity reactions to amoxicillin</li> <li>• Increased risk of bleeding</li> </ul>                                                                                                                                | <ul style="list-style-type: none"> <li>• Monitor for toxic effects of methotrexate</li> <li>• Monitor for an increased incidence of hypersensitivity reactions</li> <li>• Close INR monitoring</li> </ul>                                                                                                                                                             |
| <b>Quinolones</b>                                         | <ul style="list-style-type: none"> <li>• Multivitamins/minerals with polyvalent cations (e.g., magnesium, calcium, iron, zinc), antacids</li> <li>• QT-prolonging agents, e.g., antidepressants, anti-psychotics, antiarrhythmics</li> <li>• Corticosteroids (systemic)</li> <li>• Phenprocoumon</li> </ul> | <ul style="list-style-type: none"> <li>• Reduce absorption of quinolones, risk of reduced bioavailability and efficacy</li> <li>• Increased risk of QTc interval prolongation</li> <li>• Enhance the adverse/toxic effect of quinolones, especially, the risk of tendonitis and tendon rupture may be increased.</li> <li>• Increased risk of bleeding</li> </ul> | <ul style="list-style-type: none"> <li>• Consider administering an oral quinolone at least 2 hours before the dose of a multivitamin that contains polyvalent cations or an antacids</li> <li>• EKG monitoring</li> <li>• Monitor closely for new onset tendon or joint pain</li> <li>• Monitor INR closely and consider reducing the vitamin K antagonist</li> </ul> |
| <b>Glycopeptides, lipopeptides, and lipoglycopeptides</b> | <ul style="list-style-type: none"> <li>• Statins</li> </ul>                                                                                                                                                                                                                                                 | <ul style="list-style-type: none"> <li>• Enhance the adverse/toxic effect of daptomycin</li> </ul>                                                                                                                                                                                                                                                                | <ul style="list-style-type: none"> <li>• Consider CPK monitoring or temporarily stopping statin therapy</li> </ul>                                                                                                                                                                                                                                                    |
| <b>Oxazolidinones</b>                                     | <ul style="list-style-type: none"> <li>• SSRIs/SNRIs</li> <li>• Triptans</li> <li>• Tricyclic Antidepressants</li> </ul>                                                                                                                                                                                    | <ul style="list-style-type: none"> <li>• Risk of serotonin syndrome</li> </ul>                                                                                                                                                                                                                                                                                    | <ul style="list-style-type: none"> <li>• Avoid combination</li> </ul>                                                                                                                                                                                                                                                                                                 |

|                      |                                                                                                                                                                                    |                                                                                                                                                                                   |                                                                                                                                                                                                                                                                                 |
|----------------------|------------------------------------------------------------------------------------------------------------------------------------------------------------------------------------|-----------------------------------------------------------------------------------------------------------------------------------------------------------------------------------|---------------------------------------------------------------------------------------------------------------------------------------------------------------------------------------------------------------------------------------------------------------------------------|
| <b>Tetracyclines</b> | <ul style="list-style-type: none"> <li>• Multivitamins/minerals with polyvalent cations (e.g., magnesium, calcium, iron, zinc), antacids</li> <li>• Phenprocoumon</li> </ul>       | <ul style="list-style-type: none"> <li>• Reduce absorption of Tetracyclines, risk of reduced bioavailability and efficacy of Tetracyclines</li> <li>• Risk of bleeding</li> </ul> | <ul style="list-style-type: none"> <li>• Consider administering an oral tetracycline at least 2 hours before the dose of a multivitamin that contains polyvalent cations or an antacid</li> <li>• Monitor INR closely and consider reducing the Vitamin K Antagonist</li> </ul> |
| <b>Cotrimoxazole</b> | <ul style="list-style-type: none"> <li>• ACE-inhibitors<br/>Angiotensin II Receptor Blockers<br/>Spironolactone</li> <li>• Phenprocoumon</li> <li>• Antidiabetic Agents</li> </ul> | <ul style="list-style-type: none"> <li>• Hyperkalemia</li> <li>• Increased risk of bleeding</li> <li>• Enhance the hypoglycemic effect</li> </ul>                                 | <ul style="list-style-type: none"> <li>• Close monitoring of serum potassium</li> <li>• Monitor INR closely and consider reducing the vitamin K antagonist</li> <li>• Observe closely hypoglycemic effects</li> </ul>                                                           |
| <b>Rifampicin</b>    | <ul style="list-style-type: none"> <li>• Numerous interacting drugs, e.g., DOACs</li> <li>• Statins, amitriptyline, citalopram</li> </ul>                                          | <ul style="list-style-type: none"> <li>• Decreased serum concentration of the interacting drug</li> </ul>                                                                         | <ul style="list-style-type: none"> <li>• Monitor and dose adjustment of the interacting drug</li> </ul>                                                                                                                                                                         |

Footnote: INR: international normalized ratio blood test, CPK: creatine phosphokinase, ACE-inhibitors: angiotensin converting enzyme-inhibitor, DOACs: direct oral anticoagulants, SSRIs: selective serotonin reuptake inhibitors, SNRIs: serotonin and norepinephrine reuptake inhibitors.

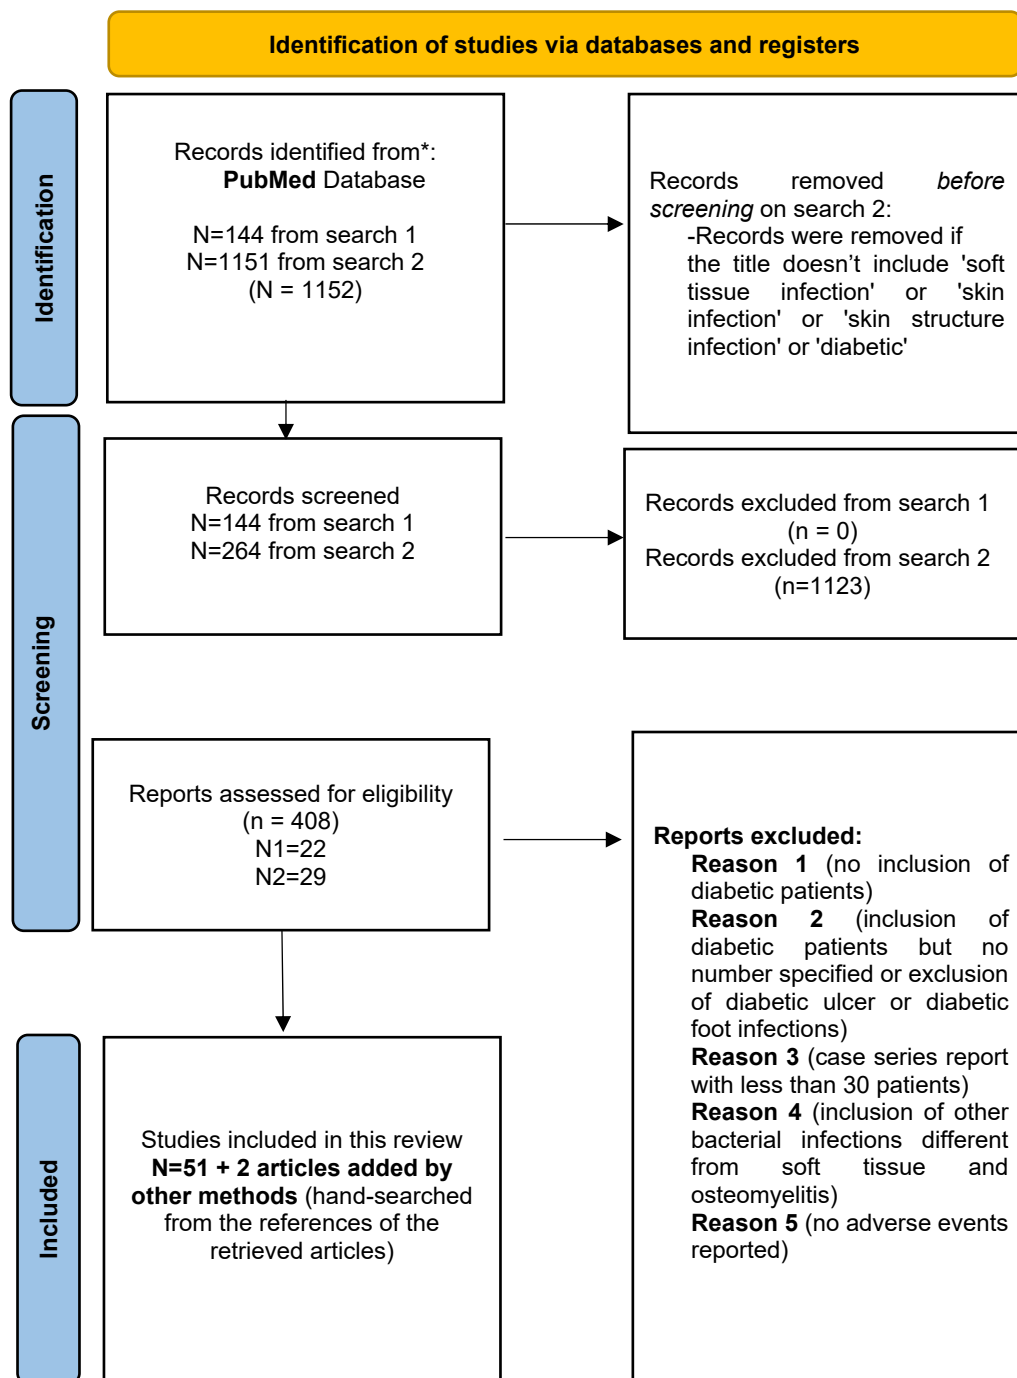

**Figure S1.** Flowchart of selected studies.
